# Supplementary material
Source: PubMed Central journal article supplement (PMC5868252)
Supplement: 10.1074_M117.814327_jbc.M117.814327-1.pdf [file 10.1074_M117.814327_jbc.M117.814327-1.pdf]

**S-Glutathionylation of Estrogen Receptor Alpha Regulates Dendritic Cell Metabolic Function**

Jie Zhang<sup>1, a</sup>, Zhi-wei Ye<sup>1, a</sup>, Wei Chen<sup>3</sup>, Yefim Manevich<sup>1</sup>, Shikhar Mehrotra<sup>4</sup>, Lauren Ball<sup>1</sup>, Yvonne Janssen-Heininger<sup>5</sup>, Kenneth D. Tew<sup>1</sup>, Danyelle M. Townsend<sup>2</sup>

**Table S1. Mouse Estrogen receptor signaling (SAB Target List) M96, predesigned 96-well panel for use with SYBR® Green.**

**FIGURE S1.** mRNAs from WT or *Gstp1/p2<sup>-/-</sup>* BMDDC were extracted and quantified by estrogen receptor signaling PCR array (Bio-Rad). Quantitative analyses of each gene were applied by Bio-Rad PrimePCR Analysis software (v.1.0.030.1023), and relative gene expression is shown in red for up-regulation and in green for down-regulation in *Gstp1/p2<sup>-/-</sup>* mice. This plot was created from the data in Table 1.

**FIGURE S2.** Characteristic fragmentation patterns of S-glutathionylated peptides by CID and ETD.

**FIGURE S3.** Raw data for proteomic identification of modified cysteine residues.

**Supporting Information**
**Table S1. Mouse Estrogen receptor signaling (SAB Target List) M96, predesigned 96-well panel for use with SYBR® Green.**

| Well | Gene Name                                                  | Symbol   | Well | Gene Name                                                | Symbol  |
|------|------------------------------------------------------------|----------|------|----------------------------------------------------------|---------|
| A1   | Actin, beta                                                | Actb     | E1   | Amyloid beta (A4) precursor protein-binding, family B1   | Apbb1   |
| A2   | Brain derived neurotrophic factor                          | Bdnf     | E2   | Complement component 3                                   | C3      |
| A3   | Cbp/p300-interacting transactivator                        | Cited2   | E3   | Cytochrome P450, family 19, subfamily a, polypeptide 1   | Cyp19a1 |
| A4   | Early growth response 3                                    | Egr3     | E4   | Estrogen receptor 2 (beta)                               | Esr2    |
| A5   | Glucose-6-phosphate dehydrogenase X-linked                 | G6pdx    | E5   | Insulin-like growth factor 1                             | Igf1    |
| A6   | Jun-B oncogene                                             | Junb     | E6   | Lipoprotein lipase                                       | Lpl     |
| A7   | Matrix metalloproteinase 9                                 | Mmp9     | E7   | Nuclear receptor coactivator 1                           | Ncoa1   |
| A8   | Nephroblastoma overexpressed gene                          | Nov      | E8   | Nuclear receptor subfamily 3, group C, member 1          | Nr3c1   |
| A9   | PDZ domain containing 1                                    | Pdzk1    | E9   | Patched homolog 1                                        | Ptch1   |
| A10  | S100 calcium binding protein A6 (calyculin)                | S100a6   | E10  | Secreted phosphoprotein 1                                | Spp1    |
| A11  | Thrombospondin 1                                           | Thbs1    | E11  | Wingless-related MMTV integration site 4                 | Wnt4    |
| A12  | Glyceraldehyde-3-phosphate dehydrogenase                   | Gapdh    | E12  | PrimePCR RNA Quality Assay                               | RQ1     |
| B1   | Adenosine A1 receptor                                      | Adora1   | F1   | Beta-2 microglobulin                                     | B2m     |
| B2   | Bone morphogenetic protein 4                               | Bmp4     | F2   | Caveolin 1, caveolae protein                             | Cav1    |
| B3   | Creatine kinase, brain                                     | Ckb      | F3   | Cytochrome P450, family 1, subfamily a, polypeptide 1    | Cyp1a1  |
| B4   | V-erb-b2 erythroblastic leukemia viral oncogene homolog 2  | ErbB2    | F4   | FBJ osteosarcoma oncogene                                | Fos     |
| B5   | Glucuronidase, beta                                        | Gusb     | F5   | Insulin-like growth factor binding protein 4             | Igfbp4  |
| B6   | Kallikrein B, plasma 1                                     | Klkb1    | F6   | Latent transforming growth factor beta binding protein 1 | Ltbp1   |
| B7   | Metastasis associated 1                                    | Mta1     | F7   | Nuclear receptor coactivator 2                           | Ncoa2   |
| B8   | Nuclear receptor subfamily 0, group B, member 1            | Nr0b1    | F8   | Nuclear receptor subfamily 5, group A, member 2          | Nr5a2   |
| B9   | Proline, glutamic acid and leucine rich protein 1          | Pelp1    | F9   | Prostaglandin-endoperoxide synthase 2                    | Ptgs2   |
| B10  | Scaffold attachment factor B                               | Safb     | F10  | Trefoil factor 1                                         | Tff1    |
| B11  | Vitamin D receptor                                         | Vdr      | F11  | Wingless-related MMTV integration site 5A                | Wnt5a   |
| B12  | Hypoxanthine guanine phosphoribosyl transferase            | Hprt     | F12  | PrimePCR RNA Quality Assay                               | RQ2     |
| C1   | Aryl-hydrocarbon receptor                                  | Ahr      | G1   | Breast cancer anti-estrogen resistance 1                 | Bcar1   |
| C2   | Bone morphogenetic protein 7                               | Bmp7     | G2   | Chemokine (C-C motif) ligand 12                          | Ccl12   |
| C3   | Connective tissue growth factor                            | Ctgf     | G3   | Estrogen receptor-binding fragment-associated gene 9     | Ebag9   |
| C4   | V-erb-b2 erythroblastic leukemia viral oncogene homolog 3  | ErbB3    | G4   | Forkhead box A1                                          | Foxa1   |
| C5   | Heat shock protein 90, alpha (cytosolic), class A member 1 | Hsp90aa1 | G5   | Insulin-like growth factor binding protein 5             | Igfbp5  |
| C6   | L1 cell adhesion molecule                                  | L1cam    | G6   | V-maf musculoaponeurotic fibrosarcoma oncogene family    | Maff    |
| C7   | Myelocytomatosis oncogene                                  | Myc      | G7   | Nuclear receptor coactivator 3                           | Ncoa3   |
| C8   | Nuclear receptor subfamily 0, group B, member 2            | Nr0b2    | G8   | Nuclear receptor interacting protein 1                   | Nrip1   |
| C9   | Progesterone receptor                                      | Pgr      | G9   | V-ral simian leukemia viral oncogene homolog A           | Rala    |
| C10  | Snail homolog 1 (Drosophila)                               | Snai1    | G10  | Transforming growth factor alpha                         | Tgfa    |
| C11  | Vascular endothelial growth factor A                       | Vegfa    | G11  | X-box binding protein 1                                  | Xbp1    |
| C12  | PrimePCR DNA Contamination Control Assay                   | gDNA     | G12  | PrimePCR Reverse Transcription Control Assay             | RT      |
| D1   | A kinase (PRKA) anchor protein 1                           | Akap1    | H1   | BCL2-like 1                                              | Bcl2l1  |
| D2   | Breast cancer 1                                            | Brca1    | H2   | Cyclin D1                                                | Ccnd1   |
| D3   | Cathepsin D                                                | Ctsd     | H3   | Ephrin A5                                                | Efna5   |
| D4   | Estrogen receptor 1 (alpha)                                | Esr1     | H4   | Follistatin                                              | Fst     |
| D5   | Heat shock protein 90 alpha (cytosolic), class B member 1  | Hsp90ab1 | H5   | Insulin receptor substrate 1                             | Irs1    |
| D6   | Lectin, galactose binding, soluble 1                       | Lgals1   | H6   | Mediator complex subunit 1                               | Med1    |
| D7   | Ngfi-A binding protein 2                                   | Nab2     | H7   | Nuclear receptor co-repressor 2                          | Ncor2   |
| D8   | Nuclear receptor subfamily 2, group F, member 6            | Nr2f6    | H8   | Neuropilin 1                                             | Nrp1    |
| D9   | Prohibitin 2                                               | Phb2     | H9   | Retinoic acid receptor, alpha                            | Rara    |
| D10  | Suppressor of cytokine signaling 3                         | Socs3    | H10  | Transforming growth factor, beta 3                       | Tgfb3   |
| D11  | WNT1 inducible signaling pathway protein 2                 | Wisp2    | H11  | TATA box binding protein                                 | Tbp     |
| D12  | PrimePCR Positive Control Assay                            | PCR      | H12  | Blank                                                    | Blank   |

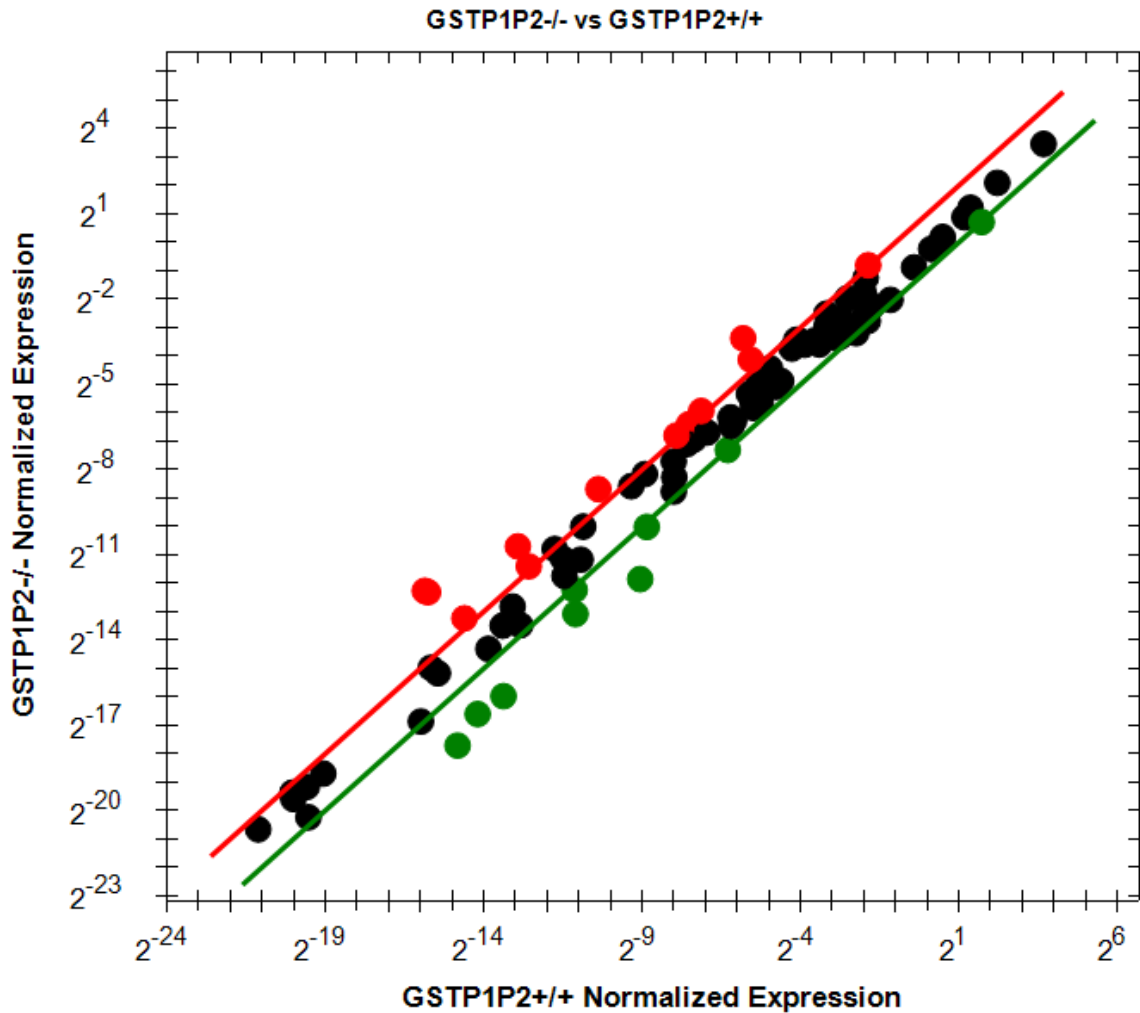

**FIGURE S1.** mRNAs from WT or *Gstp1/p2*<sup>-/-</sup> BMDDC were extracted and quantified by estrogen receptor signaling PCR array (Bio-Rad). Quantitative analyses of each gene were applied by Bio-Rad PrimePCR Analysis software (v.1.0.030.1023), and relative gene expression is shown in red for up-regulation and in green for down-regulation in *Gstp1/p2*<sup>-/-</sup> mice. This plot was created from the data in Table 1.

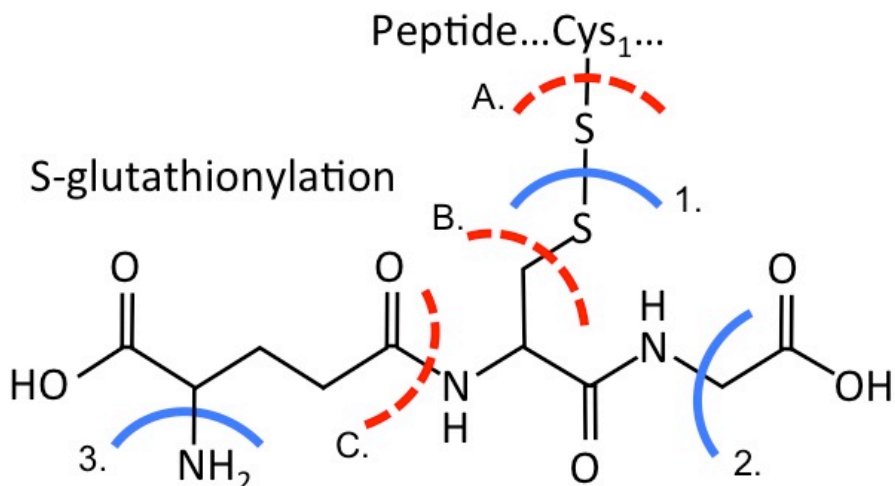

Signature Fragments of S-glutathionylated Peptides:

Fragmentation by ETD MS/MS (blue)

1.  $\Delta$  mass = Glutathionylated peptide (MH<sup>+</sup>) -305.07 Da; Neutral loss of glutathione
2.  $\Delta$  mass = Glutathionylated peptide (MH<sup>+</sup>) -58 Da; (Cys +246)
3.  $\Delta$  mass = Glutathionylated peptide (MH<sup>+</sup>) -15 Da; (Cys +290)

Glutathione ions: 308, 290, 246

Fragmentation by CID MS/MS (red)

- A.  $\Delta$  mass = Glutathionylated peptide (MH<sup>+</sup>) -338 Da; (Cys -33.99)
- B.  $\Delta$  mass = Glutathionylated peptide (MH<sup>+</sup>) -273 Da; (Cys +31.97)
- C.  $\Delta$  mass = Glutathionylated peptide (MH<sup>+</sup>) -129 Da; Neutral loss  $\gamma$ glutamic acid

**FIGURE S2.** Characteristic fragmentation patterns of S-glutathionylated peptides by CID and ETD.

A

011917\_SCW\_V\_97\_DrZhang\_ERAlpha\_Trypsin#18082 RT: 102.32 AV: 1 NL: 9.05E2  
T: ITMS + c NSI.d Full.ms2 1288.48@cid35.00 [340.00-2000.00]

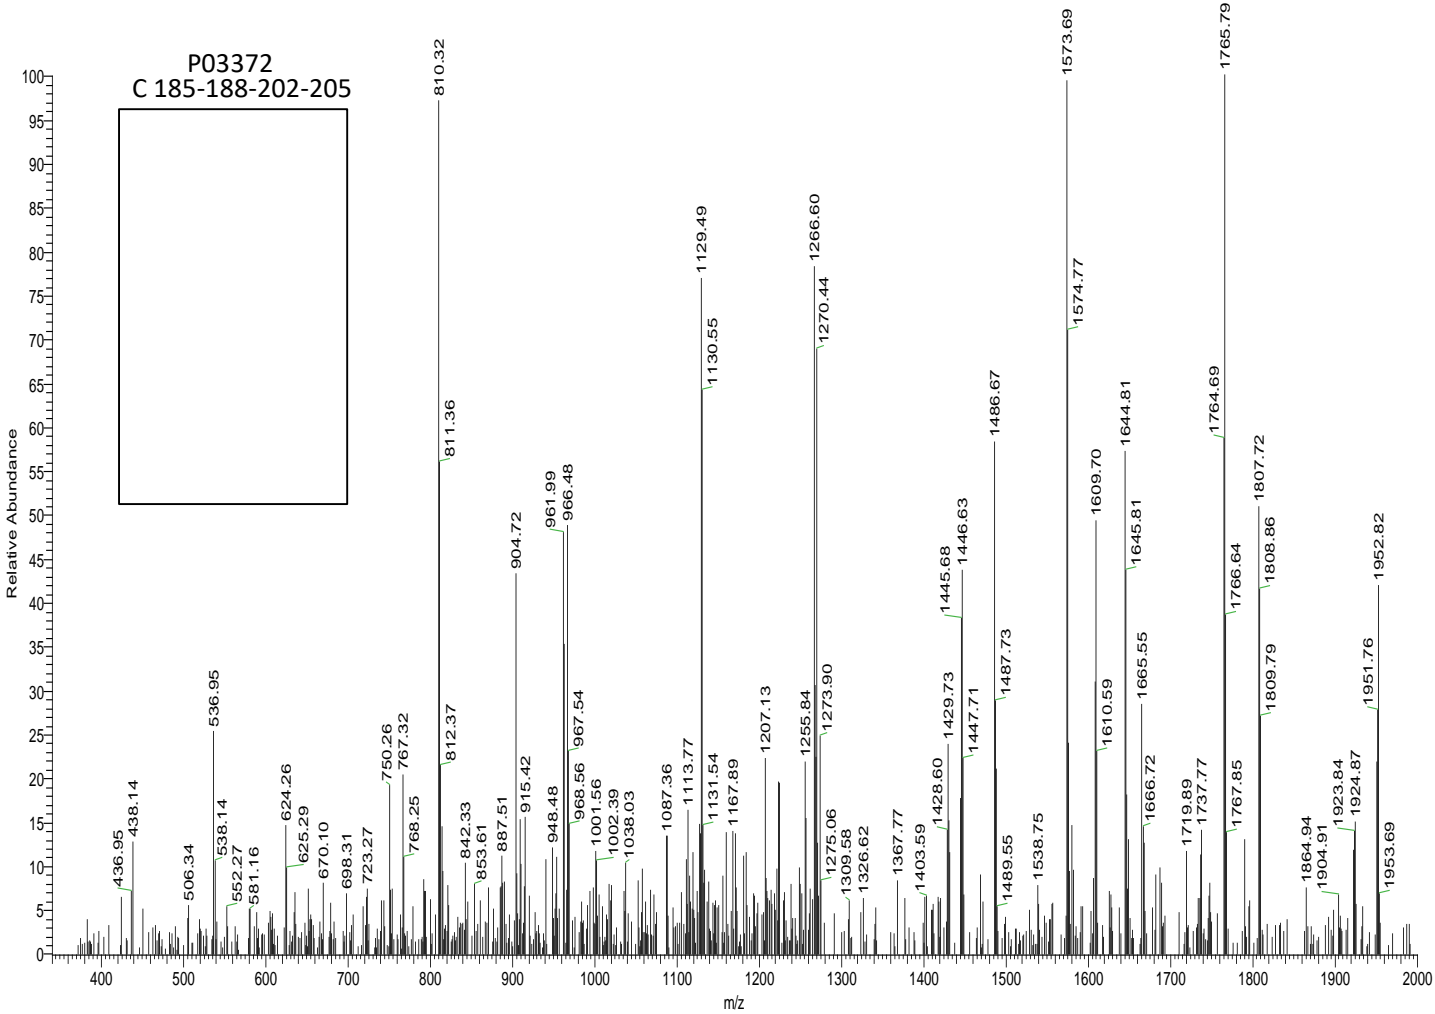

FIGURE S3. Raw data for proteomic identification of modified cysteine residues.

B

011917\_SCW\_V\_97\_DrZhang\_ERAalpha\_LysC\_AspN#11066 RT: 73.14 AV: 1 NL: 6.73E3  
F: FTMS + c NSI d sa Full ms2 641.59@etd100.00 [50.00-1935.00]

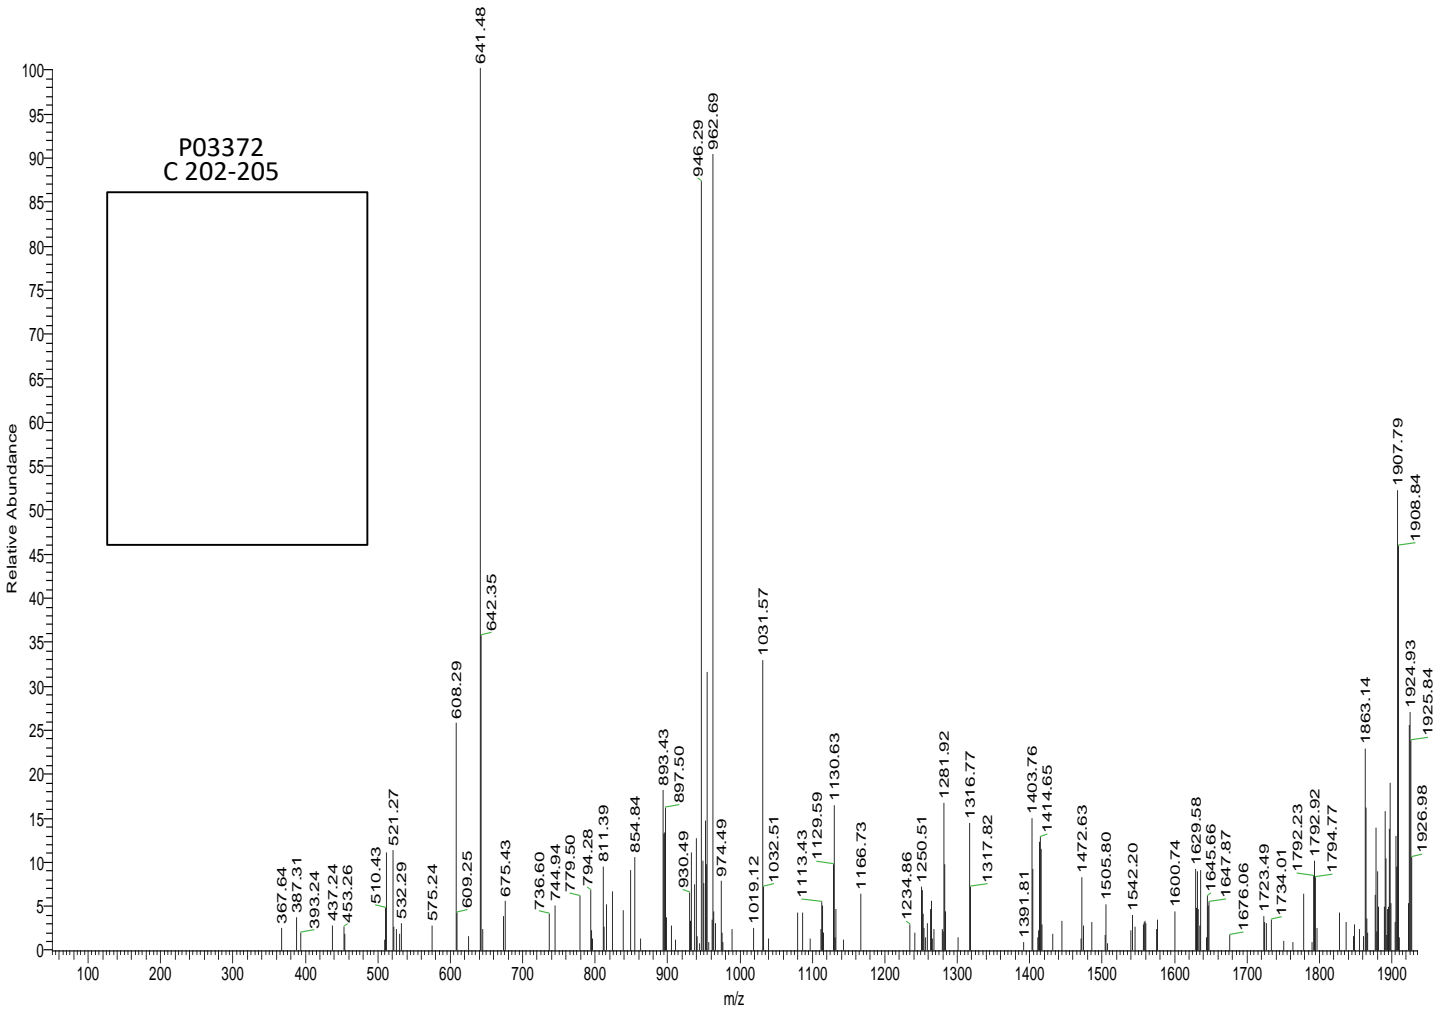

FIGURE S3. Raw data for proteomic identification of modified cysteine residues.

C

021417\_SCW\_V\_97\_ER\_Trypsin\_Rerun#7742 RT: 58.20 AV: 1 NL: 4.64E2  
 T: TMS+ c NSI.d Full.ms2 1127.47@cid35.00 [300.00-2000.00]

P03372  
 C 221-227

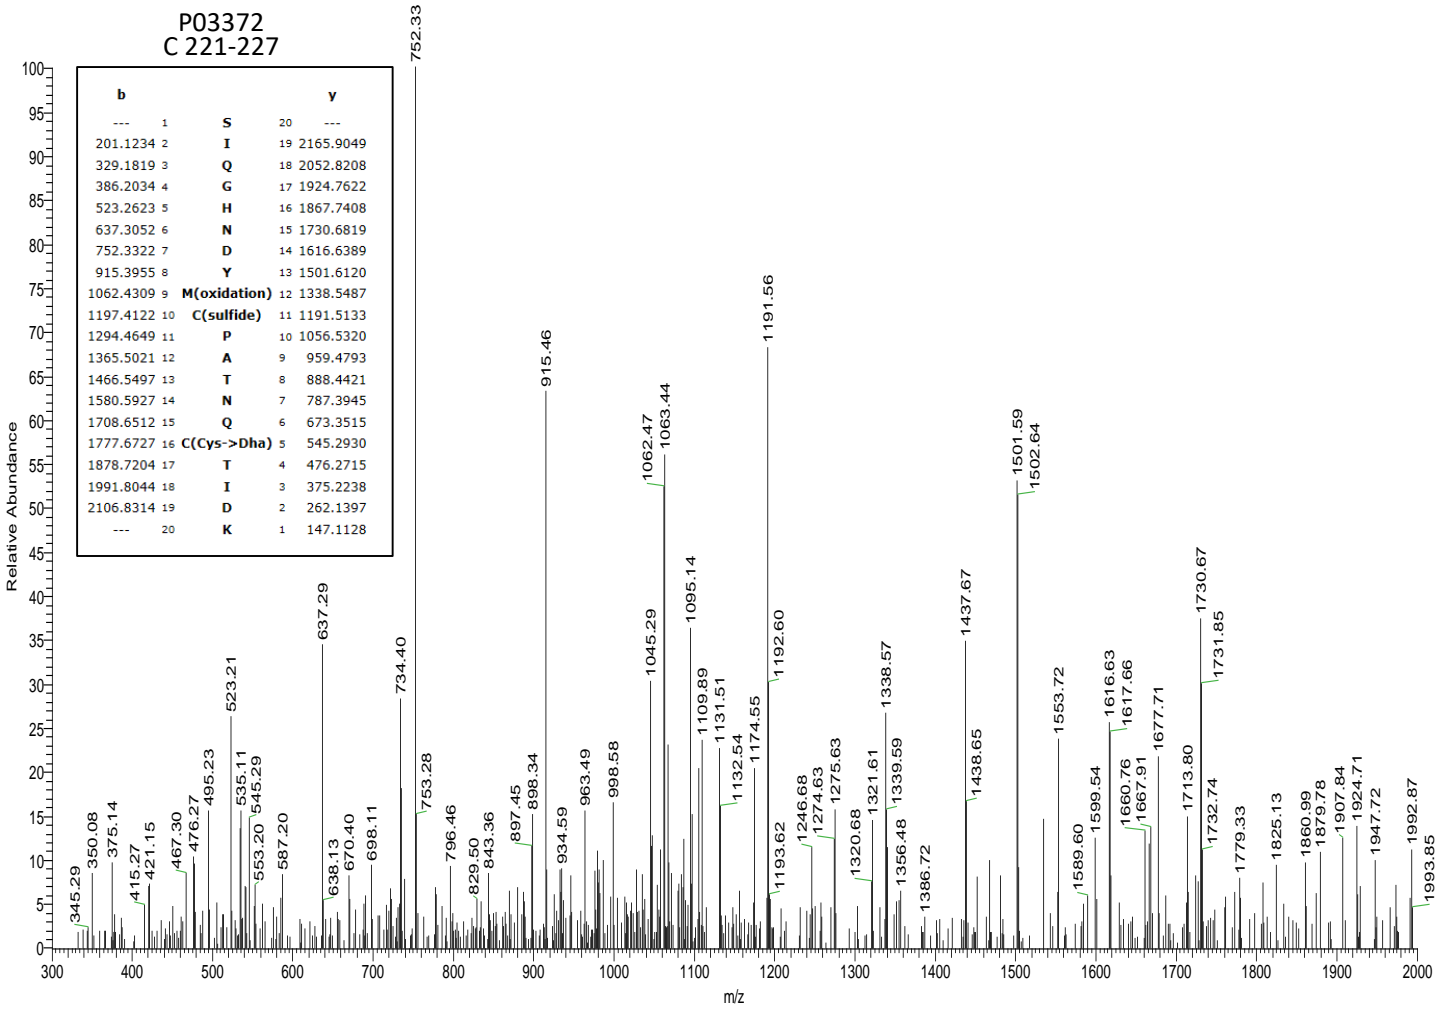

D

011917\_SCW\_V\_97\_DrZhang\_ERAlpha\_Trypsin#7334 RT: 49.94 AV: 1 NL: 4.30E3  
 F: ITMS +c NSI d sa Full ms2 696.05@etd75.00 [50.00-2000.00]

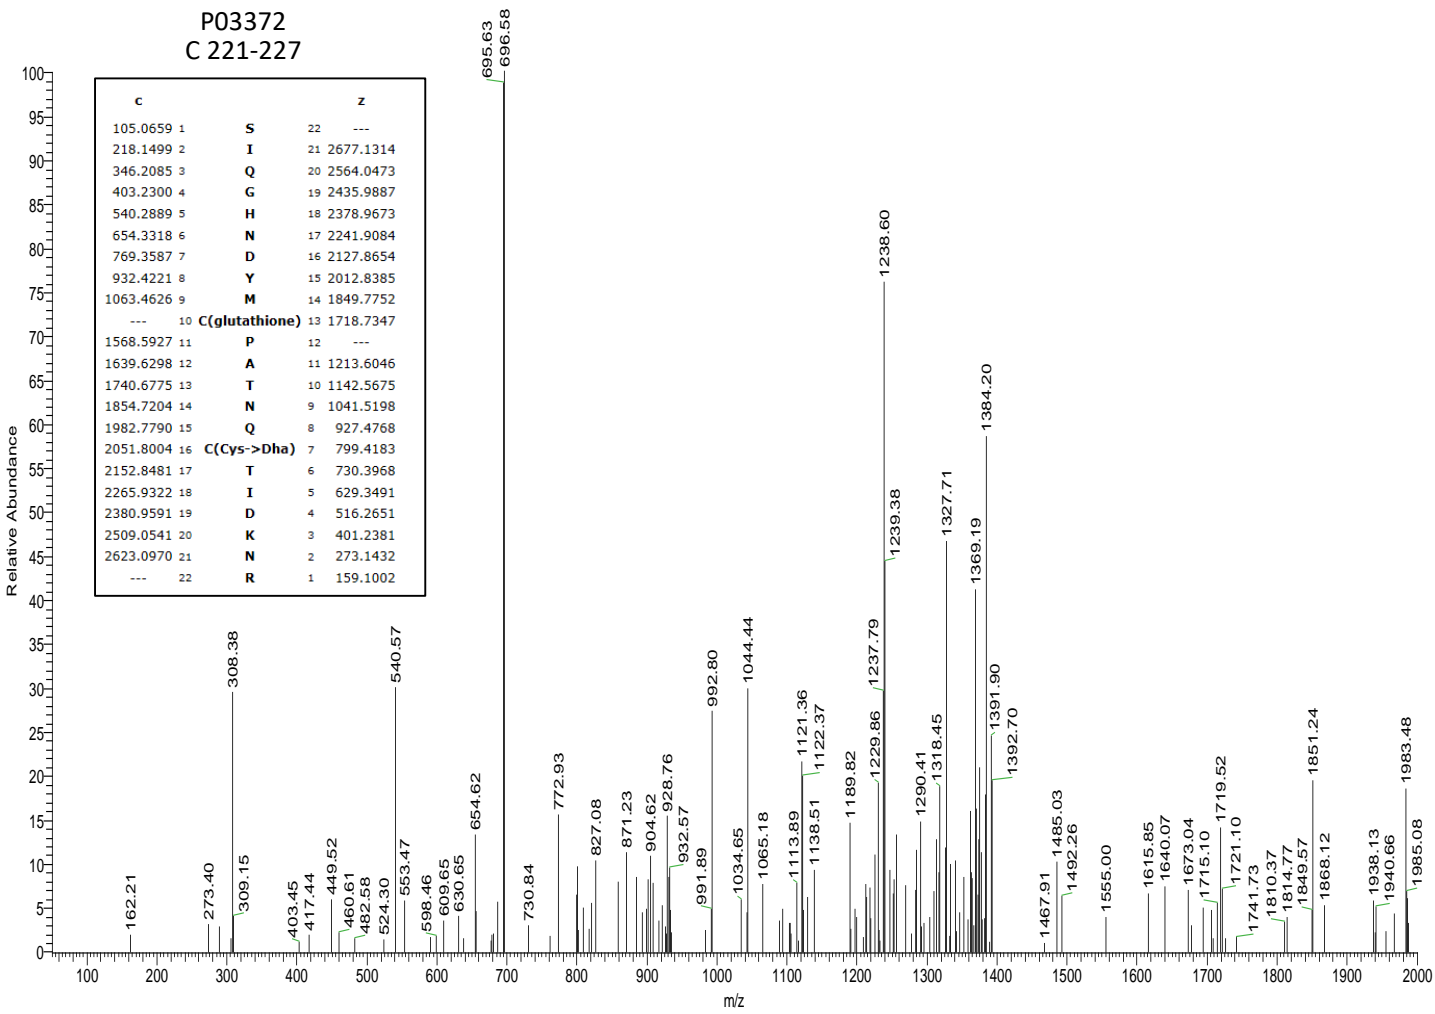

**FIGURE S3.** Raw data for proteomic identification of modified cysteine residues.



E

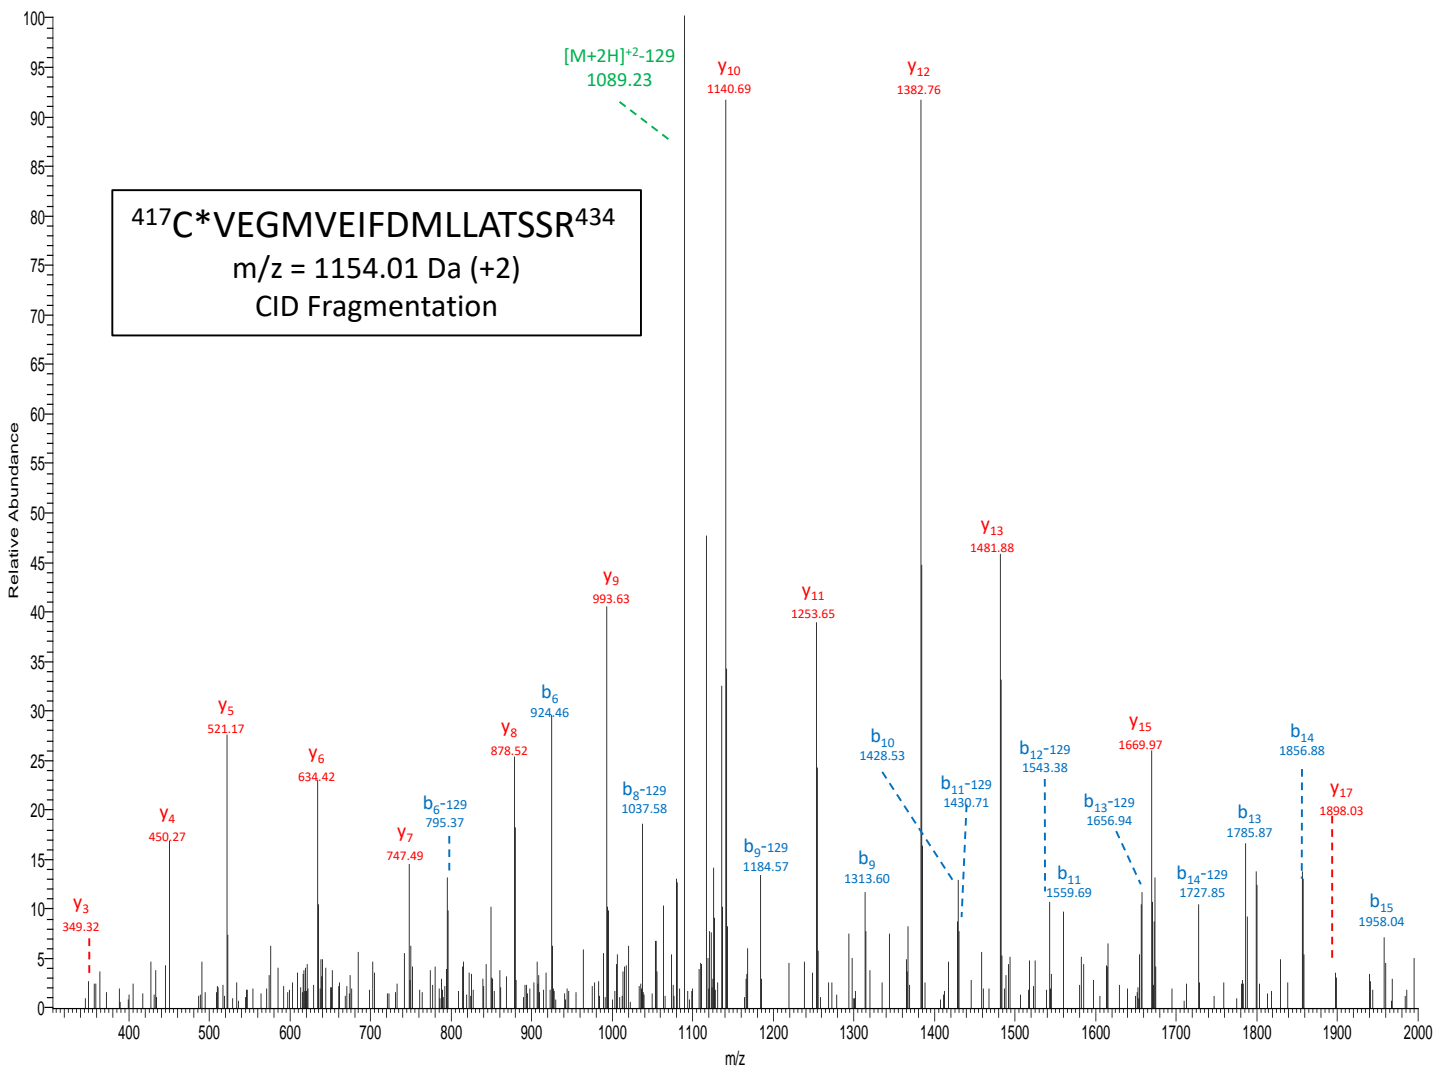

FIGURE S3. Raw data for proteomic identification of modified cysteine residues.

F

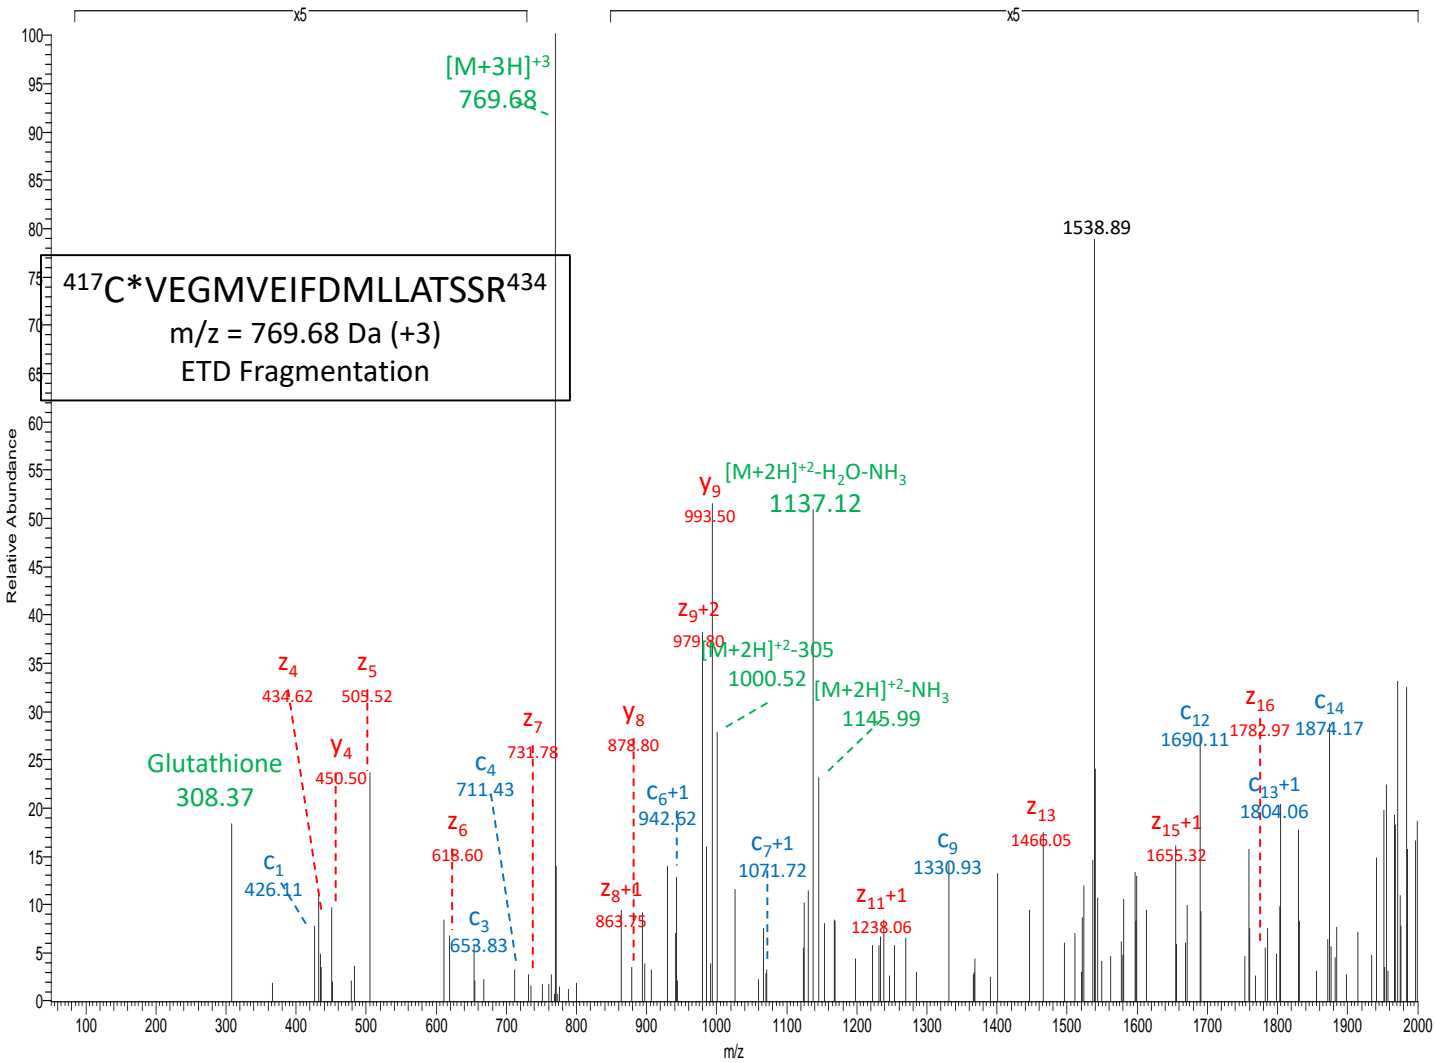

FIGURE S3. Raw data for proteomic identification of modified cysteine residues.

G

011917\_SCW\_V\_97\_DrZhang\_ERAlpha\_Trypsin#2490 RT: 23.71 AV: 1 NL: 8.27E2  
F: ITMS + c NSI d Fullms2 397.17@cid35.00 [95.00-805.00]

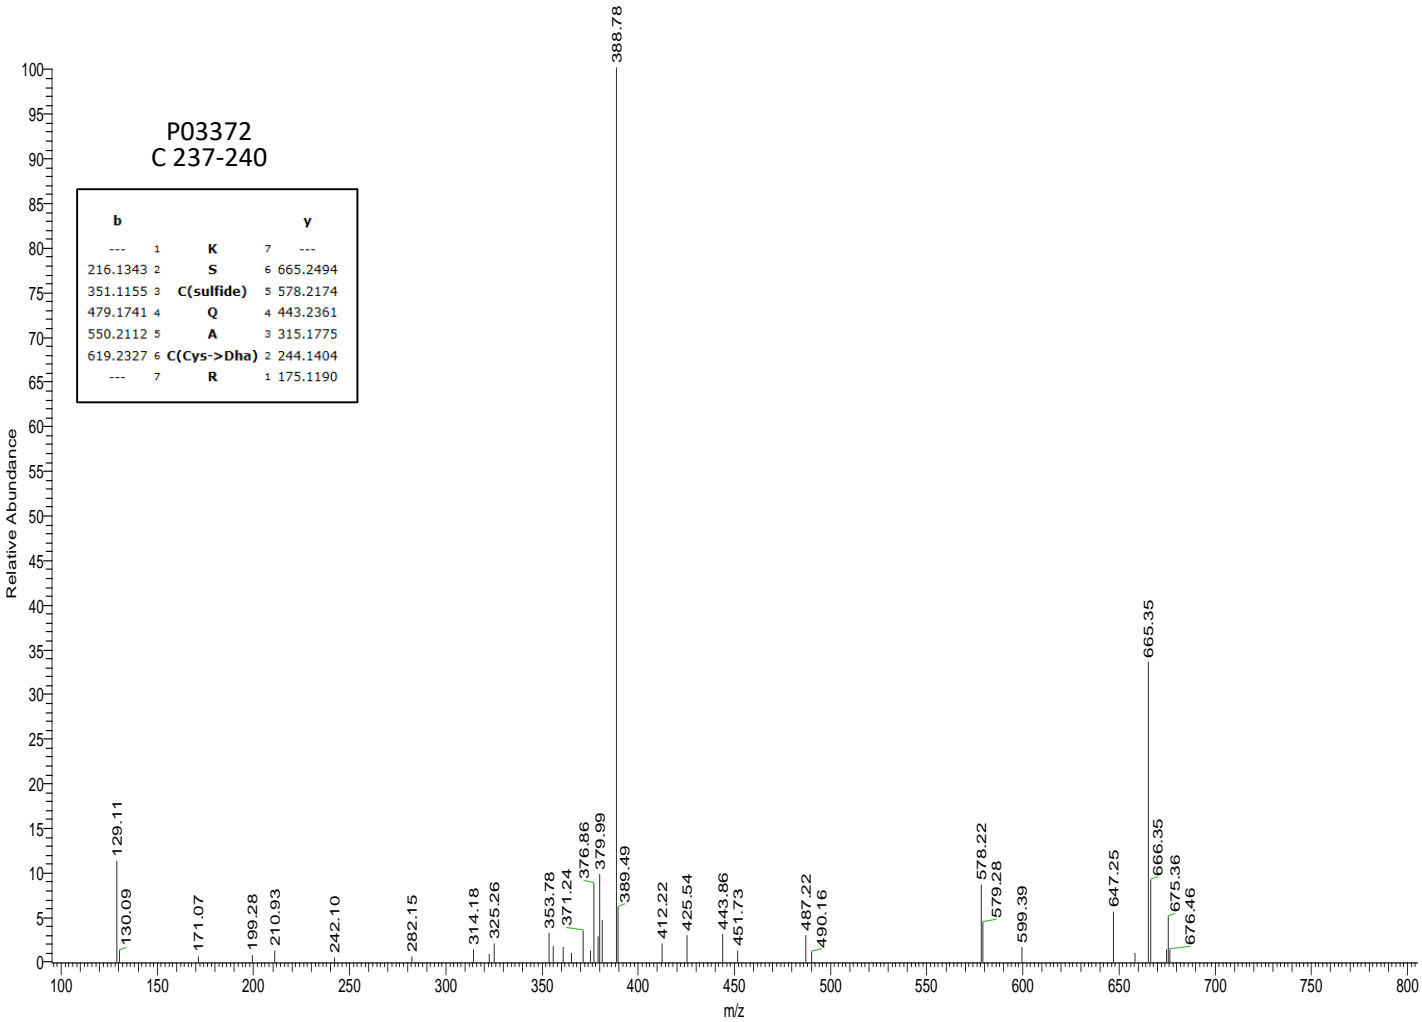

FIGURE S3. Raw data for proteomic identification of modified cysteine residues.

H

011917\_SCW\_V\_97\_DrZhang\_ERAlpha\_Trypsin#7532 RT: 50.82 AV: 1 NL: 2.43E4  
T: TMS + c NSI d sa Full ms2 422.49@etd100.00 [50.00-1280.00]

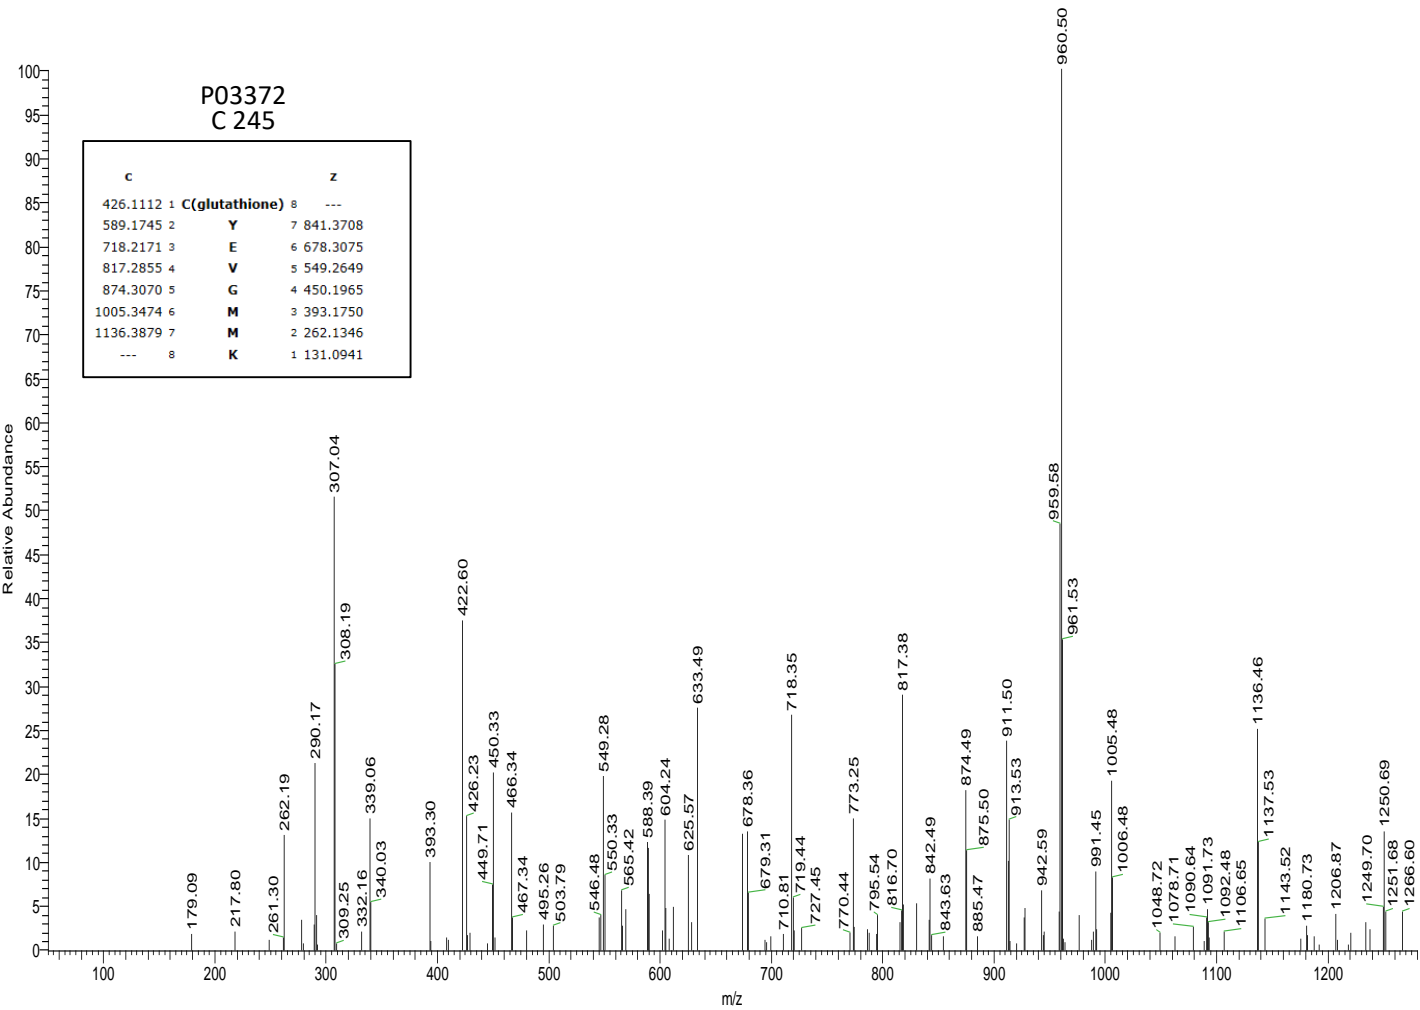

FIGURE S3. Raw data for proteomic identification of modified cysteine residues.

021417\_SCW\_V\_97\_ER\_Trypsin\_Rerun#5897 RT: 46.88 AV: 1 NL: 1.29E3  
 F: FTMS + c NSI d sa Full ms2 427.82@etd100.00 [50.00-1295.00]

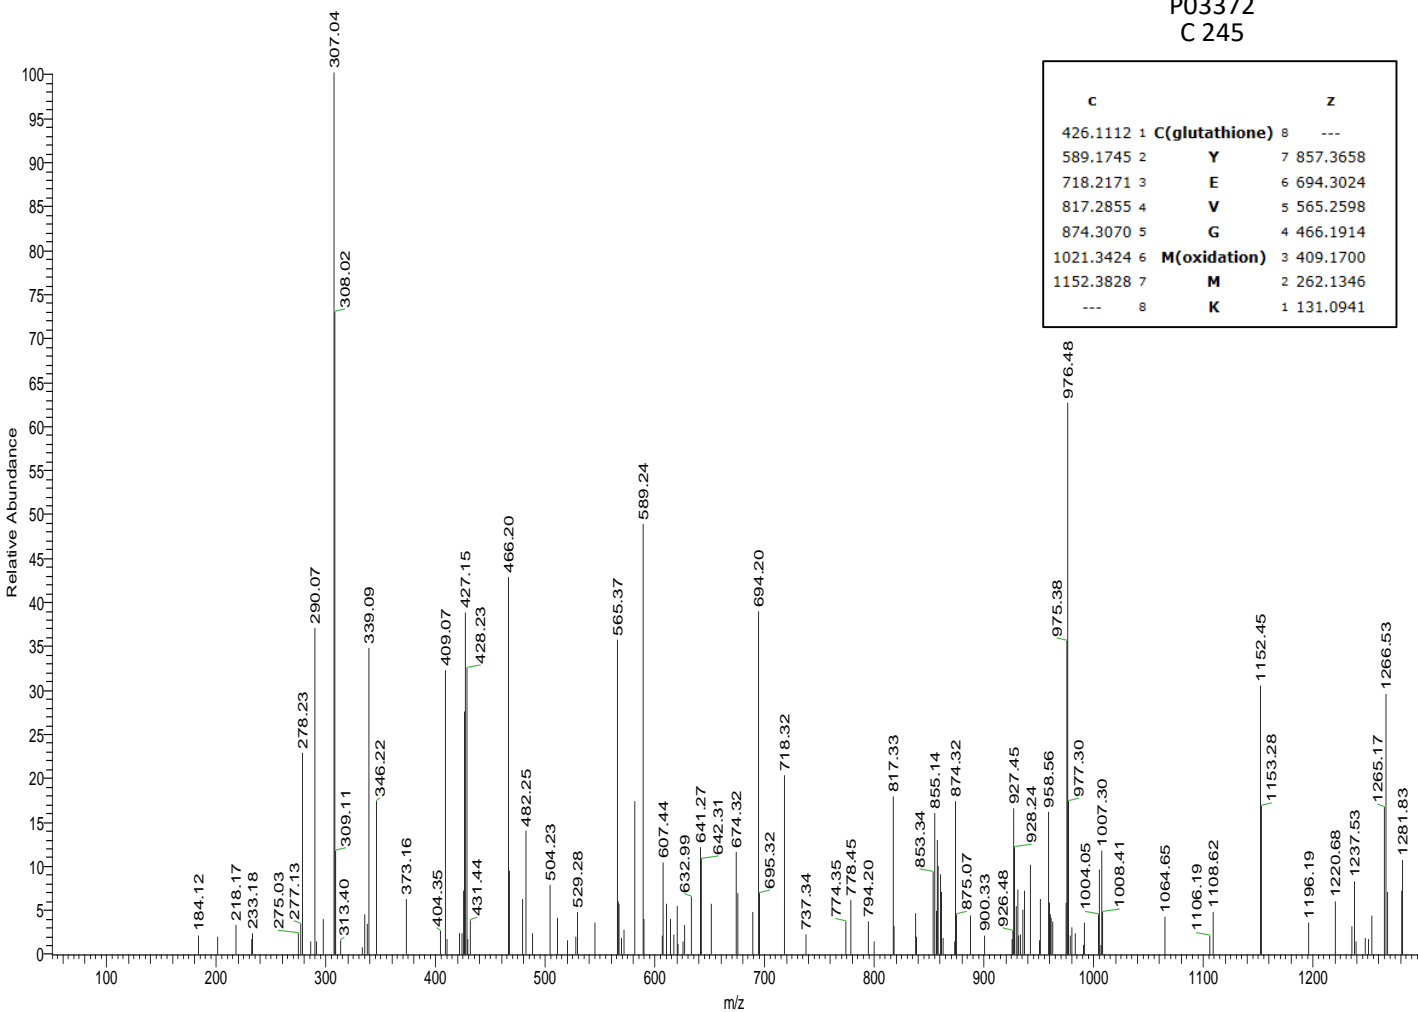

P03372  
 C 245

| c           | z                       |
|-------------|-------------------------|
| 426.1112 1  | C(glutathione) 8 ---    |
| 589.1745 2  | Y 7 857.3658            |
| 718.2171 3  | E 6 694.3024            |
| 817.2855 4  | V 5 565.2598            |
| 874.3070 5  | G 4 466.1914            |
| 1021.3424 6 | M(oxidation) 3 409.1700 |
| 1152.3828 7 | M 2 262.1346            |
| ---         | K 1 131.0941            |

FIGURE S3. Raw data for proteomic identification of modified cysteine residues.

J

011917\_SCW\_V\_97\_DrZhang\_ERAlpha\_Trypsin#14816 RT: 86.10 AV: 1 NL: 3.67E4  
 T: TMS+ c NSI d Full ms2 923.89@cid35.00 [240.00-1860.00]

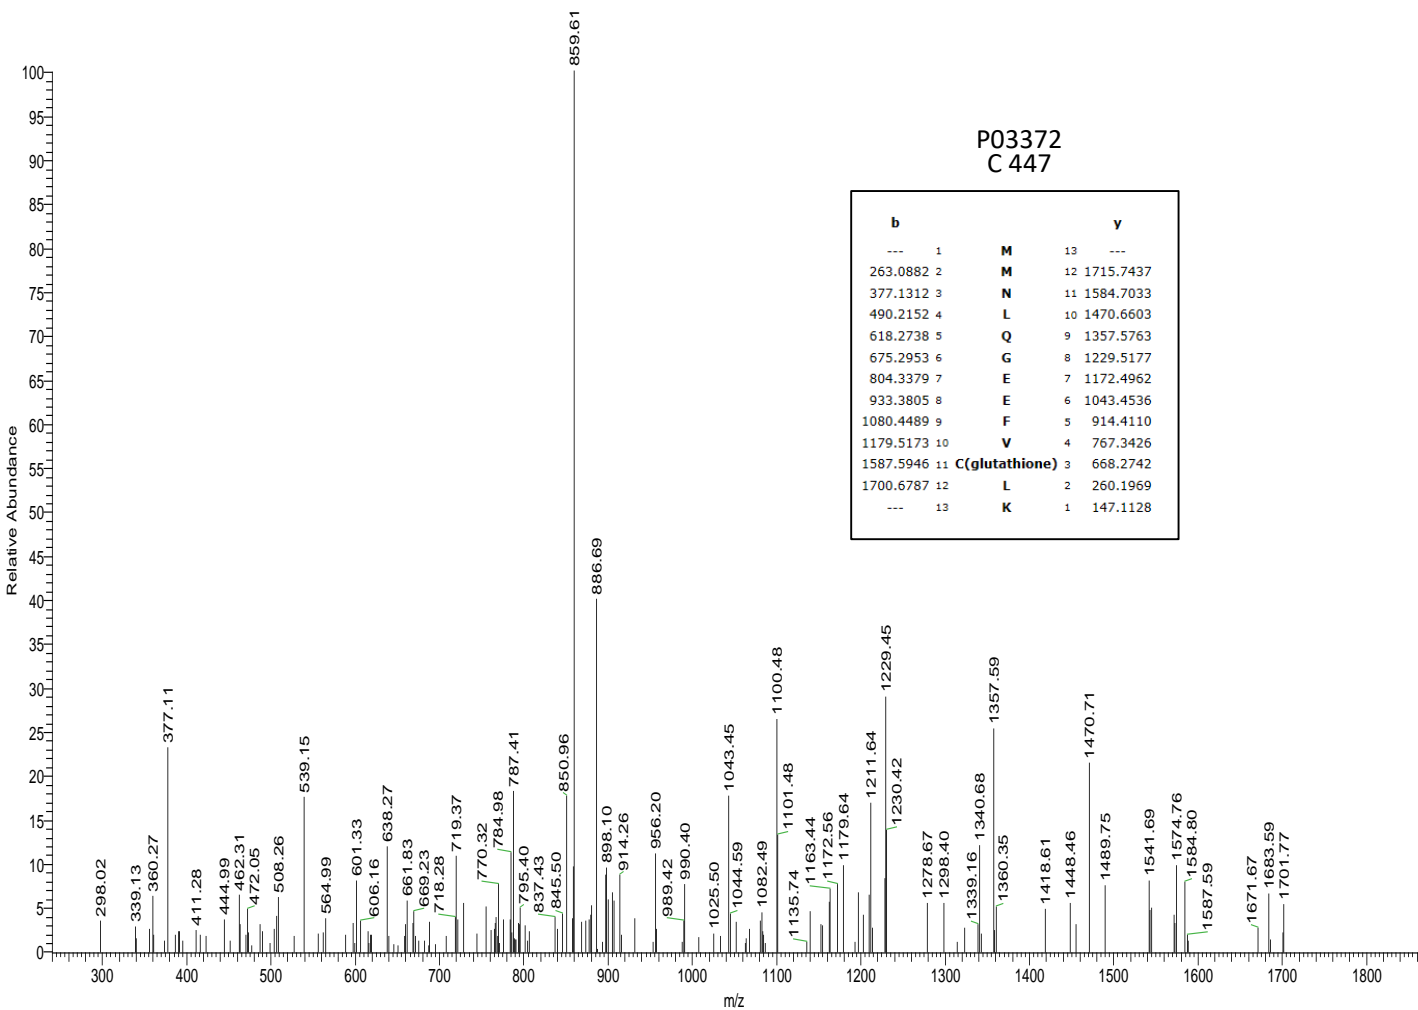

**FIGURE S3.** Raw data for proteomic identification of modified cysteine residues.

K

011917\_SCW\_V\_97\_DrZhang\_ERAalpha\_Trypsin#12809 RT: 76.25 AV: 1 NL: 6.03E4  
 T: FTMS + c NSI d sa Full ms2 621.60@etd100.00 [50.00-1875.00]

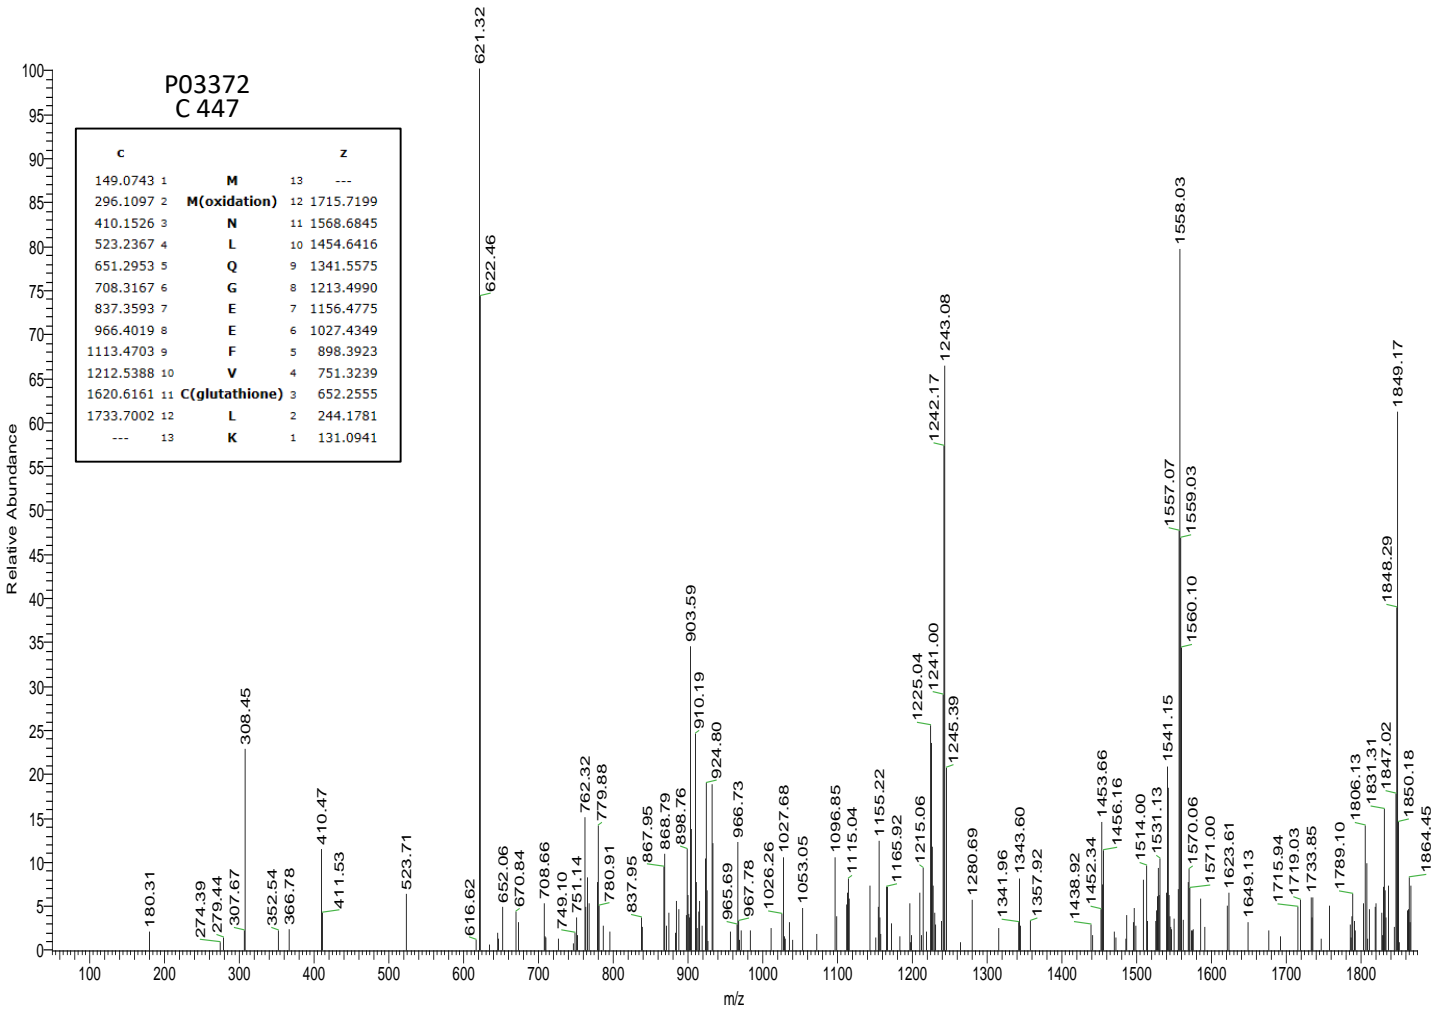

FIGURE S3. Raw data for proteomic identification of modified cysteine residues.

L

110916\_SCW\_V\_85\_Lys\_C\_Trypsin\_First\_ZT#19506 RT: 114.32 AV: 1 NL: 5.11E3  
 T: ITMS + c NSI/d Full ms2 770.06@cid35.00 [200.00-2000.00]

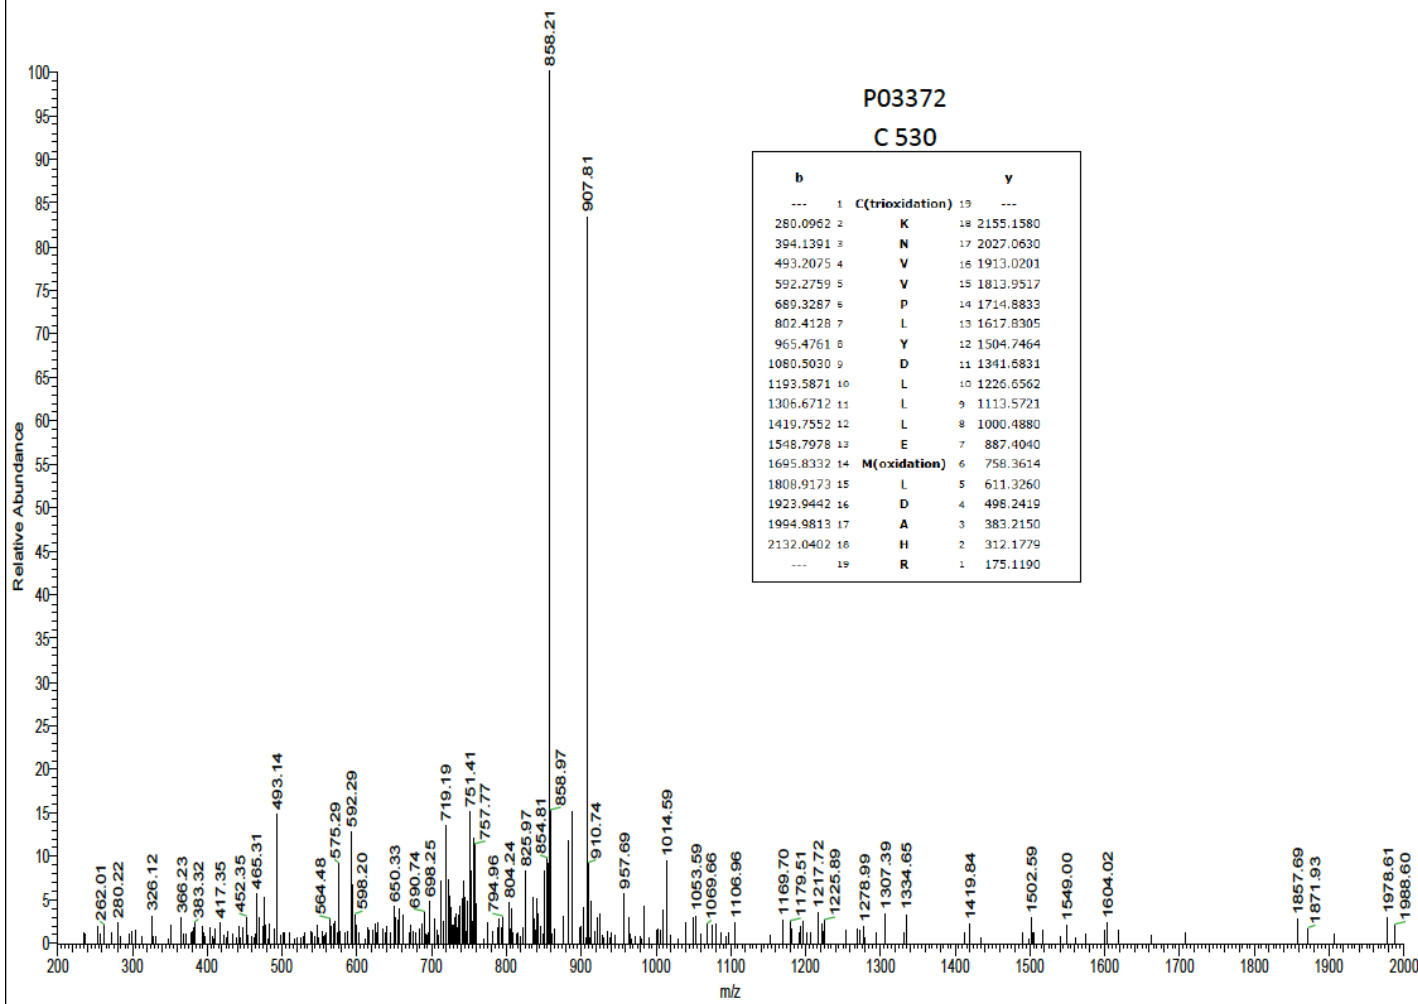

FIGURE S3. Raw data for proteomic identification of modified cysteine residues.
